# Supplementary material for: pH-triggered reversible sol–gel transition in aqueous solutions of amphiphilic gradient copolymers
Source: Royal Society of Chemistry journal article supplement (doi:10.1039/c1sm06600e), 2011-01-01
Supplement: c1sm06600e.pdf [file c1sm06600e.pdf]

**Supporting information.**

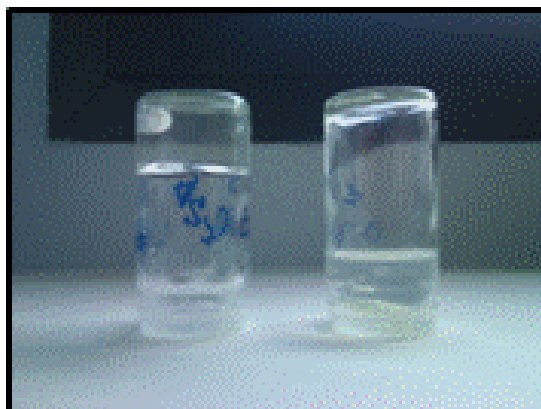

**Figure SI-1.** Photograph of the gel at pH=5.5 (left) and liquid (viscous) polymer solution at pH=9 (right)
